# Supplementary material for: Effect of late gadolinium enhancement on left atrial impairment in myocarditis patients
Source: PubMed Central journal article supplement (PMC10873434; doi:10.1007/s00330-023-10176-3), 2023-09-02
Supplement: 330_2023_10176_MOESM1_ESM.pdf [file 330_2023_10176_MOESM1_ESM.pdf]

**Effect of Late Gadolinium Enhancement on  
Left Atrial Impairment in Myocarditis Patients**

**Electronic Supplementary Material (ESM)**

## Sequence parameters

All cine-images were acquired using a balanced steady-state free precession and retrospective gating during an expiratory breath-hold manoeuvres (TE: 1.7msec; TR: 3.4msec; flip-angle: 45°, section thickness = 8 mm) in long-axis (two-, three- and four-chamber view) and short-axis plane with whole ventricular coverage from base to apex.

T2-STIR images were obtained using triple inversion recovery T2-weighted pulse sequence (TR=2 RR, TE  $\approx$  70 msec; flip-angle: 45°, section thickness = 8 mm, FOV 300×300 mm<sup>2</sup>) in long-axis (two-, three- and four-chamber view) and short-axis plane with whole ventricular coverage from base to apex

T1 mapping was performed in the short-axis plane in three slices (at the base, mid-ventricular, and apex, respectively) using a single-breath-hold, ECG-triggered, MOLLI sequence before contrast media injection (TE 1.1 msec; TR 2.5 msec; flip angle 35°; FOV, 300 × 300 mm<sup>2</sup>).

T2 mapping was acquired before the administration of contrast-media on three representative short-axis slices (at the base, mid-ventricular, and apex, respectively) using a single-breath-hold, black-blood prepared ECG-triggered, spin-echo multiecho sequence.

LGE imaging was performed in both long and short axis slices 10-12 minutes after contrast media injection (Gadovist, Bayer Healthcare, Berlin, Germany) with a dose of 0.15 ml per kg body weight using phase-sensitive inversion recovery sequences (PSIR) (TE: 2.0 msec; TR: 3.4 msec; flip-angle: 20°, section thickness = 8 mm) with an inversion time determined using the Look-Locker technique.

**Supplemental Table 1****All myocarditis (n=113)**

|                               | Mild LGE<br>(n= 67) | Moderate LGE<br>(n= 33) | Severe LGE<br>(n= 13) | p            |
|-------------------------------|---------------------|-------------------------|-----------------------|--------------|
| Age, y                        | 35,79 ± 17,06       | 44,77 ± 20,44           | 47,36 ± 24,93         | <b>0,045</b> |
| Male, n (%)                   | 50 (75%)            | 21 (63%)                | 11                    | 0,227        |
| Weight, kg                    | 70,07 ± 13,90       | 69,31 ± 13,93           | 73,87 ± 9,12          | 0,718        |
| Height, cm                    | 170,78 ± 6,60       | 170,40 ± 6,26           | 171 ± 6,14            | 0,642        |
| BSA, m <sup>2</sup>           | 1,80 ± 0,19         | 1,78 ± 0,18             | 1,87 ± 0,10           | 0,564        |
| Hypertension, n (%)           | 8 (12%)             | 6 (18%)                 | 2 (15%)               | 0,521        |
| Dyslipidemia, n (%)           | 8 (12%)             | 8 (24%)                 | 8 (61%)               | 0,622        |
| Obesity, n (%)                | 7 (10%)             | 4 (12%)                 | 1 (8%)                | 0,846        |
| Smoke, n (%)                  | 7 (10%)             | 6 (18%)                 | 1 (8%)                | 0,342        |
| Diabetes, n (%)               | 2 (3%)              | 1 (3%)                  | 1 (8%)                | 0,655        |
| Familiarity for CAD, n (%)    | 10 (15%)            | 10 (30%)                | 3 (23%)               | 0,085        |
| LVEF, %                       | 55,37 ± 8,66        | 54,78 ± 10,19           | 45,44 ± 12,09         | <b>0,012</b> |
| LVEDV/BSA, ml/m <sup>2</sup>  | 90,10 ± 22,37       | 96,07 ± 20,65           | 120,41 ± 40,12        | <b>0,003</b> |
| LVESV/BSA, ml/m <sup>2</sup>  | 43,10 ± 20,18       | 44,93 ± 19,56           | 67,60 ± 40,22         | <b>0,003</b> |
| LVSV/BSA, ml/m <sup>2</sup>   | 50,60 ± 9,74        | 51,11 ± 8,22            | 52,78 ± 14,35         | 0,827        |
| LV mass/BSA, g/m <sup>2</sup> | 59,58 ± 11,35       | 65,05 ± 12,11           | 64,36 ± 14,13         | 0,14         |

|                                 |               |              |              |              |
|---------------------------------|---------------|--------------|--------------|--------------|
| Reservoir, %                    | 34,97 ± 12,32 | 30,37 ± 9,92 | 22,85 ± 9,20 | <b>0,004</b> |
| Reservoir rate, s <sup>-1</sup> | 1,58 ± 0,58   | 1,39 ± 0,48  | 2,22 ± 3,93  | 0,232        |
| Conduit, %                      | 21,71 ± 10,10 | 16,57 ± 7,35 | 13,82 ± 7,83 | <b>0,017</b> |
| Conduit rate, s <sup>-1</sup>   | -2,29 ± 1,03  | -1,73 ± 0,89 | -1,36 ± 0,92 | <b>0,004</b> |
| Booster, %                      | 13,77 ± 4,87  | 13,41 ± 4,31 | 9,26 ± 4,01  | <b>0,014</b> |
| Booster rate, s <sup>-1</sup>   | -1,80 ± 0,59  | -1,66 ± 0,48 | -1,18 ± 0,51 | <b>0,004</b> |
| LA volume                       | 11,45 ± 2,90  | 12,81 ± 1,89 | 11,98 ± 2,34 | 0,606        |

**Supplemental Table 1:** Demographic, baseline clinical characteristics, and CMR findings according to the extent of myocardial fibrosis.

The p value shows the ANOVA value between the three groups.

BSA: body surface area; CAD: coronary artery disease; LA: Left Atrium; LGE: Late gadolinium enhancement; LVEF: Left Ventricle Ejection Fraction; LVEDV: Left Ventricle End-Diastolic Volume; LVESV: Left Ventricle End-Systolic Volume; LVSV: Left Volume Stroke Volume.

LA volume was indexed to body surface area.

**Bold** indicates statistical significance.

## Supplemental Figure 1

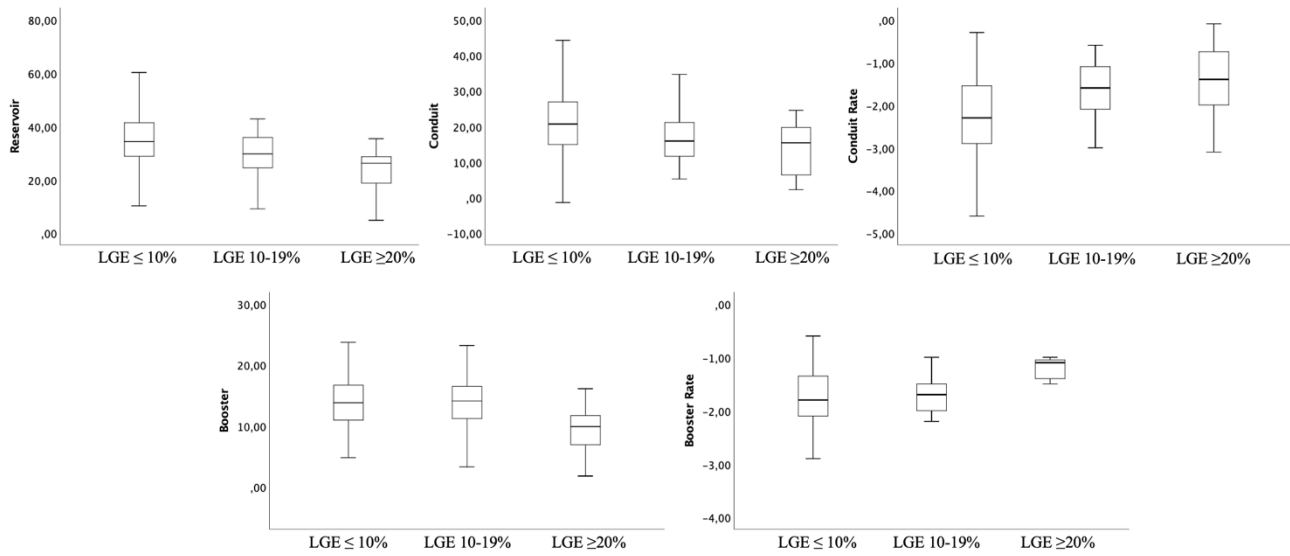

**Supplementary Figure 1:** LA dynamics in acute myocarditis patients. Box plots comparing LA functions between acute myocarditis patients according to the extent of LV enhancement.
